# Supplementary material for: Ultrasound-Guided vs. Fluoroscopy-Guided Interventions for Back Pain Management: A Systematic Review and Meta-Analysis of Randomized Controlled Trials
Source: MDPI journal article supplement (doi:10.3390/diagnostics13223474), 2023-11-18
Supplement: s1 [file s1]

**Table S1.** Evidence profile.

|                                                       | Postoperative pain at 1 month | Postoperative functionality (ODI index) at 1 month | Vasovagal reaction | Transient headache | Facial flushing    |
|-------------------------------------------------------|-------------------------------|----------------------------------------------------|--------------------|--------------------|--------------------|
| <b>Risk of bias</b>                                   | <b>Not serious</b>            | <b>Not serious</b>                                 | <b>Not serious</b> | <b>Not serious</b> | <b>Not serious</b> |
| Lack of allocation concealment                        | No                            | No                                                 | No                 | No                 | No                 |
| Lack of blinding                                      | No                            | No                                                 | No                 | No                 | No                 |
| Incomplete accounting of patients and outcome events  | No                            | No                                                 | No                 | No                 | No                 |
| Selective outcome reporting                           | No                            | No                                                 | No                 | No                 | No                 |
| Other limitations                                     | No                            | No                                                 | No                 | No                 | No                 |
| <b>Inconsistency</b>                                  | <b>Not serious</b>            | <b>Not serious</b>                                 | <b>Serious</b>     | <b>Serious</b>     | <b>Serious</b>     |
| I <sup>2</sup> (unexplained heterogeneity of results) | No                            | No                                                 | No                 | No                 | No                 |
| Wide variance of point estimates                      | No                            | No                                                 | Yes                | Yes                | Yes                |
| Confidence intervals (CIs) do not overlap             | No                            | No                                                 | No                 | No                 | No                 |
| <b>Indirectness</b>                                   | <b>Not serious</b>            | <b>Not serious</b>                                 | <b>Not serious</b> | <b>Not serious</b> | <b>Not serious</b> |
| Differences in population                             | No                            | No                                                 | No                 | No                 | No                 |
| Differences in interventions                          | No                            | No                                                 | No                 | No                 | No                 |
| Differences in outcome measures                       | No                            | No                                                 | No                 | No                 | No                 |
| Indirect comparisons                                  | No                            | No                                                 | No                 | No                 | No                 |
| <b>Imprecision</b>                                    | <b>Not serious</b>            | <b>Not serious</b>                                 | <b>Serious</b>     | <b>Serious</b>     | <b>Serious</b>     |
| Few patients                                          | No                            | No                                                 | No                 | No                 | No                 |

|                                          |             |             |             |             |             |
|------------------------------------------|-------------|-------------|-------------|-------------|-------------|
| Wide confidence interval (CI)            | No          | No          | Yes         | Yes         | Yes         |
| <b>Upgrading</b>                         | <b>None</b> | <b>None</b> | <b>None</b> | <b>None</b> | <b>None</b> |
| RR>2 or RR<0.5<br>RR>5 or RR<0.2         | No          | No          | No          | No          | No          |
| Dose-response gradient                   | No          | No          | No          | No          | No          |
| Effect of plausible residual confounding | No          | No          | No          | No          | No          |
